# Supplementary material for: A value-added use of volatile turpentine: antifungal activity and QSAR study of β-pinene derivatives against three agricultural fungi
Source: Royal Society of Chemistry journal article supplement (doi:10.1039/c5ra10660e), 2015-01-01
Supplement: c5ra10660e1.pdf [file c5ra10660e1.pdf]

### The datas of the title compounds

#### 4-isopropylcyclohexa-1, 3-dienecarboxylic acid (**3**, C<sub>10</sub>H<sub>16</sub>O<sub>3</sub>)

IR (cm<sup>-1</sup>): 3415 (O–H); 2961, 2874 (–CH<sub>3</sub>, –CH<sub>2</sub>); 1700 (–C=O). <sup>1</sup>H NMR(CDCl<sub>3</sub>, δ/ppm, 300 MHz): 6.94 (d, 1H, O=C–C=CH–); 5.90 (d, 1H, –CH=C–(Me)<sub>2</sub>); 2.46 (m, H, –CH–(Me)<sub>2</sub>); 2.51 (t, 2H, –CH<sub>2</sub>–C–C=O); 2.27 (t, 2H, –CH<sub>2</sub>–C–C=C); 1.10 (d, 6H, –CH<sub>3</sub>). TOF-ESI-MS (m/z): 167 [M + H]<sup>+</sup>. Anal. calcd for C<sub>10</sub>H<sub>14</sub>O<sub>2</sub>: C, 72.29; H, 11.67. Found: C, 73.11; H, 10.99.

#### 4-isopropyl-N-phenyl cyclohexa-1, 3-dienecarboxamide (**5a**, C<sub>16</sub>H<sub>19</sub>NO)

IR (cm<sup>-1</sup>): 3312 (N–H); 2957, 2870 (–CH<sub>3</sub>, –CH<sub>2</sub>); 1653, 1630 (–C=O). <sup>1</sup>H NMR (CDCl<sub>3</sub>, δ/ppm, 300 MHz): 7.57 (s, 1H, CONH–); 7.07-7.55 (m, 5H, Ar–H); 6.76-6.78 (d, 1H, OC–C=CH–); 5.83-5.85 (d, 1H, –CH=C–(Me)<sub>2</sub>); 2.85-3.03 (m, 1H, –CH–(Me)<sub>2</sub>); 2.49-256 (t, 2H, –CH<sub>2</sub>–C–CO); 2.23-2.29 (t, 2H, –CH<sub>2</sub>–C–C=C); 1.04-1.10 (d, 6H, CH<sub>3</sub>). TOF-ESI-MS (m/z): 242 [M+H]<sup>+</sup>; 264 [M+Na]<sup>+</sup>. Anal. calcd for C<sub>16</sub>H<sub>19</sub>NO: C, 79.67; H, 7.88; N, 5.81. Found: C, 80.15; H, 7.42; N, 5.99.

#### 4-isopropyl-N-(o-methylphenyl) cyclohexa-1, 3-dienecarboxamide (**5b**, C<sub>17</sub>H<sub>21</sub>NO)

IR (cm<sup>-1</sup>): 3248 (NH); 2963, 2858 (CH); 1650 (N–C=O). <sup>1</sup>H NMR (CDCl<sub>3</sub>, δ/ppm, 300 MHz): 7.95 (s, 1H, CONH–); 7.02-7.43 (m, 4H, Ar–H); 6.80-6.91 (d, 1H, OC–C=CH–); 5.82-5.86 (d, 1H, –CH=C–(Me)<sub>2</sub>); 2.40-2.54 (m, 1H, –CH–(Me)<sub>2</sub>); 2.34-2.37 (t, 2H, –CH<sub>2</sub>–C–CO); 2.50-2.29 (t, 2H, –CH<sub>2</sub>–C–C=C); 2.19 (s, 3H, Ar–CH<sub>3</sub>); 1.03-1.56 (d, 6H, –CH<sub>3</sub>). TOF-ESI-MS (m/z): 256 [M+H]<sup>+</sup>; 278 [M+Na]<sup>+</sup>. Anal. calcd for C<sub>17</sub>H<sub>21</sub>NO: C, 80.00; H, 8.24; N, 5.49. Found: C, 80.12; H, 8.34; N, 5.23.

#### 4-isopropyl-N-(m-methylphenyl) cyclohexa-1, 3-dienecarboxamide (**5c**, C<sub>17</sub>H<sub>21</sub>NO).

IR (cm<sup>-1</sup>): 3302 (NH); 2959, 2870 (CH); 1650, 1653 (N–C=O). <sup>1</sup>H NMR (CDCl<sub>3</sub>, δ/ppm, 300

MHz): 7.44 (s, 1H, CONH-); 7.18-7.40 (m, 4H, Ar-H); 6.91-6.93 (d, 1H, OC-C=CH-); 5.83-5.84 (d, 1H, -CH=C-(Me)<sub>2</sub>); 2.85-3.02 (m, 1H, -CH-(Me)<sub>2</sub>); 2.49-2.55 (t, 2H, -CH<sub>2</sub>-C-CO); 2.23-2.29 (t, 2H, -CH<sub>2</sub>-C-C=C); 2.35 (s, 3H, Ar-CH<sub>3</sub>), 1.04-1.10 (d, 6H, -CH<sub>3</sub>). TOF-ESI-MS (m/z): 256 [M+H]<sup>+</sup>, 278 [M+Na]<sup>+</sup>. Anal. calcd for C<sub>17</sub>H<sub>21</sub>NO: C, 80.00; H, 8.24; N, 5.49. Found: C, 80.25; H, 8.35; N, 5.37.

**4-isopropyl-N-(p-methylphenyl) cyclohexa-1, 3-dienecarboxamide (5d, C<sub>17</sub>H<sub>21</sub>NO)**

IR (cm<sup>-1</sup>): 3315 (NH); 2963, 2870 (CH); 1650, 1635 (N-C=O). <sup>1</sup>H NMR (CDCl<sub>3</sub>, δ/ppm, 300 MHz): 7.78 (s, 1H, CONH-); 7.18-7.40 (m, 4H, Ar-H); 6.72-6.80 (d, 1H, OC-C=CH-); 5.82-5.86 (d, 1H, -CH=C-(Me)<sub>2</sub>); 2.84-3.03 (m, 1H, -CH-(Me)<sub>2</sub>); 2.49-2.55 (t, 2H, -CH<sub>2</sub>-C-CO); 2.23-2.28 (t, 2H, -CH<sub>2</sub>-C-C=C); 2.32 (s, 3H, Ar-CH<sub>3</sub>); 1.03-1.10 (d, 6H, -CH<sub>3</sub>).

TOF-ESI-MS (m/z): 256 [M+H]<sup>+</sup>; 278 [M+Na]<sup>+</sup>. Anal. calcd for C<sub>17</sub>H<sub>21</sub>NO: C, 80.00; H, 8.24; N, 5.49. Found: C, 80.13; H, 8.06; N, 5.45.

**4-isopropyl-N-(2, 4-dimethylphenyl) cyclohexa-1, 3-dienecarboxamide (5e, C<sub>18</sub>H<sub>23</sub>NO)**

IR (cm<sup>-1</sup>): 3256 (NH); 2960, 2856 (CH); 1643 (N-C=O). <sup>1</sup>H NMR (CDCl<sub>3</sub>, δ/ppm, 300 MHz): 7.74 (s, 1H, CONH-); 6.97-7.34 (m, 3H, Ar-H); 6.78-6.82 (d, 1H, OC-C=CH-); 5.81-5.86 (d, 1H, -CH=C-(Me)<sub>2</sub>); 2.36-2.44 (m, 1H, -CH-(Me)<sub>2</sub>); 2.28 (s, 3H, Ar-CH<sub>3</sub>); 2.15 (s, 3H, Ar-CH<sub>3</sub>); 1.83 (t, 2H, -CH<sub>2</sub>-C-CO); 1.75 (t, 2H, -CH<sub>2</sub>-C-C=C); 1.03-1.5 (d, 6H, -CH<sub>3</sub>). TOF-ESI-MS (m/z): 270 [M+H]<sup>+</sup>; 292 [M+Na]<sup>+</sup>. Anal. calcd for C<sub>18</sub>H<sub>23</sub>NO: C, 80.30; H, 8.55; N, 5.20. Found: C, 80.63; H, 8.19; N, 5.57.

**4-isopropyl-N-(3, 5-dimethylphenyl) cyclohexa-1, 3-dienecarboxamide (5f, C<sub>18</sub>H<sub>23</sub>NO)**

IR (cm<sup>-1</sup>): 3285 (NH); 2960, 2870 (-CH<sub>3</sub>, -CH<sub>2</sub>); 1651, 1626 (N-C=O). <sup>1</sup>H NMR (CDCl<sub>3</sub>, δ/ppm, 300 MHz): 7.78 (s, 1H, CONH-); 7.20-7.35 (m, 3H, Ar-H); 6.71-6.75 (d, 1H, OC-C=CH-);

5.83-5.85 (d, 1H,  $-\text{CH}=\text{C}(\text{Me})_2$ ); 2.85-2.87 (m, 1H,  $-\text{CH}(\text{Me})_2$ ); 2.48-2.54 (t, 2H,  $-\text{CH}_2-\text{C}-\text{CO}$ ); 2.52-2.33 (t, 2H,  $-\text{CH}_2-\text{C}=\text{C}$ ); 2.35 (s, 6H, Ar- $\text{CH}_3$ ), 1.03-1.10 (d, 6H,  $-\text{CH}_3$ ). TOF-ESI-MS (m/z): 270  $[\text{M}+\text{H}]^+$ ; 292  $[\text{M}+\text{Na}]^+$ . Anal. calcd for  $\text{C}_{18}\text{H}_{23}\text{NO}$ : C, 80.30; H, 8.55; N, 5.20. Found: C, 80.57; H, 8.23; N, 5.38.

**1-(4-isopropylcyclohexa-1,3-dienecarbonyl)-3-phenylthiourea (7a,  $\text{C}_{17}\text{H}_{20}\text{N}_2\text{OS}$ )**

IR ( $\text{cm}^{-1}$ ): 3415, 3250 (N-H); 3038 (Ar-C-H); 1658 (C=O); 1162 (C=S).  $^1\text{H}$  NMR ( $\text{CDCl}_3$ ,  $\delta/\text{ppm}$ , 300 MHz): 7.83 (s, 1H, CSNH-); 7.26 (s, 1H, CONH-); 7.37-7.43 (m, 5H, Ar-H); 6.93-6.94 (d, 1H, OC-C=CH-); 5.89-5.90 (d, 1H,  $-\text{CH}=\text{C}(\text{Me})_2$ ); 2.41-2.46 (m, H,  $-\text{CH}(\text{Me})_2$ ); 2.47-2.51 (t, 2H,  $-\text{CH}_2-\text{C}-\text{CO}$ ); 2.31-2.27 (t, 2H,  $-\text{CH}_2-\text{C}=\text{C}$ ); 1.09-1.10 (d, 6H,  $\text{CH}_3$ ). TOF-ESI-MS (m/z): 301 $[\text{M}+\text{H}]^+$ ; 323 $[\text{M}+\text{Na}]^+$ . Anal. calcd for  $\text{C}_{17}\text{H}_{19}\text{NOS}$ : C, 68.00; H, 6.67; N, 9.33; S, 10.67. Found: C, 67.78; H, 6.50; N, 8.97; S, 10.01.

**1-benzyl-3-(4-isopropylcyclohexa-1,3-dienecarbonyl)thiourea (7b,  $\text{C}_{18}\text{H}_{22}\text{N}_2\text{OS}$ )**

IR ( $\text{cm}^{-1}$ ): 3461 (N-H); 3039 (Ar-C-H); 1659 (C=O); 1163 (C=S).  $^1\text{H}$  NMR ( $\text{CDCl}_3$ ,  $\delta/\text{ppm}$ , 300 MHz): 7.74-7.77 (t, 1H, CSNH-); 7.33 (s, 1H, CONH-); 7.24-7.40 (m, 5H, Ar-H); 6.85-6.86 (d, 1H, OC-C=CH-); 5.84-5.86 (d, 1H,  $-\text{CH}=\text{C}(\text{Me})_2$ ); 2.35-2.40 (m, H,  $-\text{CH}(\text{Me})_2$ ); 2.42-2.45 (t, 2H,  $-\text{CH}_2-\text{C}-\text{CO}$ ); 2.20-2.26 (t, 2H,  $-\text{CH}_2-\text{C}=\text{C}$ ); 1.06-1.08 (d, 6H,  $\text{CH}_3$ ). TOF-ESI-MS (m/z): 313 $[\text{M}-\text{H}]^-$ . Anal. calcd for  $\text{C}_{18}\text{H}_{22}\text{N}_2\text{OS}$ : C, 68.79; H, 7.01; N, 8.92; S, 10.19. Found: C, 68.33; H, 7.04; N, 8.47; S, 9.87.

**1-(4-isopropylcyclohexa-1,3-dienecarbonyl)-3-o-tolylthiourea (7c,  $\text{C}_{18}\text{H}_{22}\text{N}_2\text{OS}$ )**

IR ( $\text{cm}^{-1}$ ): 3420 and 3209 (N-H); 2957 and 2870 ( $-\text{CH}_2$ ,  $-\text{CH}_3$ ); 1653 and 1630 ( $-\text{C}=\text{O}$ ); 1161( $-\text{C}=\text{S}$ ).  $^1\text{H}$  NMR ( $\text{CDCl}_3$ ,  $\delta/\text{ppm}$ , 300 MHz): 7.84 (s, 1H, S=C-N-H); 7.25 (s, 1H, O=C-N-H); 7.20-7.29 (m, 4H, Ar-H); 6.93, 6.95 (d, 1H, OC-C=CH-); 5.89, 5.90 (d, 1H,  $-\text{CH}=\text{C}(\text{Me})_2$ );

2.41-2.45 (m, H, -CH-(Me)<sub>2</sub>); 2.48-2.51 (t, 2H, -CH<sub>2</sub>-C-CO); 2.27-2.31 (t, 2H, -CH<sub>2</sub>-C-C=C); 2.33 (s, 3H, CH<sub>3</sub>-Ar); 1.06-1.08 (d, 6H, CH<sub>3</sub>). TOF-ESI-MS (m/z): 315 [M + H]<sup>+</sup>; 337 [M + Na]<sup>+</sup>. Anal. calcd for C<sub>18</sub>H<sub>22</sub>N<sub>2</sub>OS: C, 68.79; H, 7.01; N, 8.92; S, 10.19. Found: C, 68.47; H, 7.11; N, 8.78; S, 9.89.

**1-(4-isopropylcyclohexa-1, 3-dienecarbonyl)-3-m-tolylthiourea (7d, C<sub>18</sub>H<sub>22</sub>N<sub>2</sub>OS )**

IR (cm<sup>-1</sup>): 3423 and 3210 (N-H); 2957 and 2870 (-CH<sub>2</sub>, -CH<sub>3</sub>); 1665 (-C=O); 1145(-C=S). <sup>1</sup>H NMR (CDCl<sub>3</sub>, δ/ppm, 300 MHz): 7.82 (s, 1H, S=C-N-H); 7.43 (s, 1H, O=C-N-H); 7.25-7.52 (m, 4H, Ar-H); 6.93, 6.95 (d, 1H, OC-C=CH-); 5.87, 5.89 (d, 1H, -CH=C-(Me)<sub>2</sub>); 2.31-2.45 (m, H, -CH-(Me)<sub>2</sub>); 2.45-2.50 (t, 2H, -CH<sub>2</sub>-C-CO); 2.23-2.30 (t, 2H, -CH<sub>2</sub>-C-C=C); 2.36 (s, 3H, CH<sub>3</sub>-Ar); 1.07-1.09 (d, 6H, CH<sub>3</sub>). TOF-ESI-MS (m/z): 315 [M + H]<sup>+</sup>; 337 [M + Na]<sup>+</sup>. Anal. calcd for C<sub>18</sub>H<sub>22</sub>N<sub>2</sub>OS: C, 68.79; H, 7.01; N, 8.92; S, 10.19. Found: C, 68.57; H, 7.06; N, 8.65; S, 9.81.

**1-(4-isopropylcyclohexa-1, 3-dienecarbonyl)-3-p-tolylthiourea (7e, C<sub>18</sub>H<sub>22</sub>N<sub>2</sub>OS)**

IR (cm<sup>-1</sup>): 3415, 3203 (N-H); 3030 (Ar-C-H); 1666 (C=O); 1162 (C=S). <sup>1</sup>H NMR (CDCl<sub>3</sub>, δ/ppm, 300 MHz): 7.58 (s, 1H, CSNH-); 7.26 (s, 1H, CONH-); 7.18-7.22 (m, 4H, Ar-H); 6.93-6.94 (d, 1H, OC-C=CH-); 5.88-5.89 (d, 1H, -CH=C-(Me)<sub>2</sub>); 2.41-2.44 (m, H, -CH-(Me)<sub>2</sub>); 2.46-2.50 (t, 2H, -CH<sub>2</sub>-C-CO); 2.26-2.30 (t, 2H, -CH<sub>2</sub>-C-C=C); 2.35 (s, 3H, CH<sub>3</sub>-Ar); 1.08-1.10 (d, 6H, CH<sub>3</sub>). TOF-ESI-MS (m/z): 315 [M+H]<sup>+</sup>; 337[M+Na]<sup>+</sup>. Anal. calcd for C<sub>18</sub>H<sub>22</sub>N<sub>2</sub>OS: C, 68.79; H, 7.01; N, 8.92; S, 10.19. Found: C, 69.34; H, 7.06; N, 9.05; S, 9.78.

**1-(2,4-dimethylphenyl)-3-(4-isopropylcyclohexa-1,3-dienecarbonyl)thiourea(7f, C<sub>19</sub>H<sub>24</sub>N<sub>2</sub>OS)**

IR (cm<sup>-1</sup>): 3416, 3198 (N-H); 3030 (Ar-C-H); 1662 (C=O), 1151 (C=S). <sup>1</sup>H NMR (CDCl<sub>3</sub>, δ/ppm, 300 MHz): 7.57 (s, 1H, CSNH-); 7.26 (s, 1H, CONH-), 7.04-7.09 (m, 3H, Ar-H); 6.95-6.96 (d, 1H, OC-C=CH-); 5.89-5.90 (d, 1H, -CH=C-(Me)<sub>2</sub>); 2.40-2.44 (m, H, -CH-(Me)<sub>2</sub>);

2.47-2.51 (t, 2H,  $-\text{CH}_2-\text{C}-\text{CO}$ ); 2.30-2.34 (t, 2H,  $-\text{CH}_2-\text{C}-\text{C}=\text{C}$ ); 2.32 (s, 3H, 2- $\text{CH}_3-\text{Ar}$ ); 2.27 (s, 3H, 4- $\text{CH}_3-\text{Ar}$ ); 1.09-1.10 (d, 6H,  $\text{CH}_3$ ). TOF-ESI-MS ( $m/z$ ): 329 $[\text{M}+\text{H}]^+$ ; 351  $[\text{M}+\text{Na}]^+$ . Anal. calcd for  $\text{C}_{19}\text{H}_{24}\text{N}_2\text{OS}$ : C, 69.51; H, 7.32; N, 8.54; S, 9.76. Found: C, 69.55; H, 7.14; N, 8.62; S, 9.30.

**1-(furan-2-yl) ethanone oximyl 4-isopropylcyclohexa-1,3-dienecarboxylate (8a,  $\text{C}_{16}\text{H}_{19}\text{NO}_3$ )**

IR ( $\text{cm}^{-1}$ ): 1729 ( $-\text{O}-\text{C}=\text{O}$ ); 1606 ( $\text{C}=\text{N}$ ).  $^1\text{H}$  NMR ( $\text{CDCl}_3$ ,  $\delta/\text{ppm}$ , 300 MHz): 7.54, 7.57 (d, 1H, furan- $\alpha$ -C-H); 7.14, 7.13 (d, 1H,  $\text{OC}-\text{C}=\text{CH}-$ ); 6.93-6.94 (d, 2H, furan- $\beta$ -C-H); 5.89, 5.90 (d, 1H,  $-\text{CH}=\text{C}-(\text{Me})_2$ ); 2.89-2.91 (m, H,  $-\text{CH}-(\text{Me})_2$ ); 2.52-2.58 (t, 2H,  $-\text{CH}_2-\text{C}-\text{CO}$ ); 2.35 (s, 3H,  $-\text{N}=\text{C}-\text{CH}_3$ ); 2.22-2.29 (t, 2H,  $-\text{CH}_2-\text{C}-\text{C}=\text{C}$ ); 1.07-1.10 (d, 6H,  $\text{CH}_3$ ). TOF-ESI-MS ( $m/z$ ): 295  $[\text{M}+\text{Na}]^+$ . Anal. calcd for  $\text{C}_{16}\text{H}_{19}\text{NO}_3$ : C, 70.33; H, 6.96; N, 5.13. Found: C, 70.21; H, 7.03; N, 5.18.

**1-(thiophene-2-yl) ethanone oximyl 4-isopropylcyclohexa-1,3-dienecarboxylate (8b,  $\text{C}_{16}\text{H}_{19}\text{NO}_2\text{S}$ )**

IR ( $\text{cm}^{-1}$ ): 1738 ( $-\text{C}=\text{O}$ ); 1584 ( $-\text{C}=\text{S}$ ).  $^1\text{H}$  NMR ( $\text{CDCl}_3$ ,  $\delta/\text{ppm}$ , 300 MHz): 8.05, 8.03 (d, 1H, thiophene- $\alpha$ -C-H); 7.49, 7.50 (d, 2H, thiophene- $\beta$ -C-H); 7.09, 7.11 (d, 1H,  $\text{OC}-\text{C}=\text{CH}-$ ); 5.87, 5.89 (d, 1H,  $-\text{CH}=\text{C}-(\text{Me})_2$ ); 2.50-2.59 (m, H,  $-\text{CH}-(\text{Me})_2$ ); 2.40-2.43 (t, 2H,  $-\text{CH}_2-\text{C}-\text{CO}$ ); 2.31 (s, 3H,  $-\text{N}=\text{C}-\text{CH}_3$ ); 2.23-2.24 (t, 2H,  $-\text{CH}_2-\text{C}-\text{C}=\text{C}$ ); 1.06-1.10 (d, 6H,  $\text{CH}_3$ ). TOF-ESI-MS ( $m/z$ ): 289  $[\text{M} + \text{H}]^+$ . Anal. calcd for  $\text{C}_{16}\text{H}_{19}\text{NO}_2\text{S}$ : C, 66.44; H, 6.57; N, 9.69. Found: C, 66.88; H, 6.34; N, 9.48.

**1-(4-chlorophenyl) ethanone oximyl 4-isopropylcyclohexa-1, 3-dienecarboxylate (8c,  $\text{C}_{18}\text{H}_{20}\text{ClNO}_2$ )**

IR (cm<sup>-1</sup>): 1734 (–O–C=O); 1592 (C=N). <sup>1</sup>H NMR (CDCl<sub>3</sub>, δ/ppm, 300 MHz): 7.70, 7.72 (d, 2H, *o*–C–H); 7.33-7.36 (d, 2H, *m*–C–H); 7.13, 7.14 (d, 1H, OC–C=CH–); 5.91, 5.92 (d, 1H, –CH=C–(Me)<sub>2</sub>); 2.53-2.55 (m, H, –CH–(Me)<sub>2</sub>); 2.40-2.41 (t, 2H, –CH<sub>2</sub>–C–CO); 2.30 (s, 3H, –N=C–CH<sub>3</sub>); 2.20-2.23 (t, 2H, –CH<sub>2</sub>–C–C=C); 1.04-1.08 (d, 6H, CH<sub>3</sub>). TOF-ESI-MS (m/z): 317 [M+H]<sup>+</sup>. Anal. calcd for C<sub>18</sub>H<sub>20</sub>ClNO<sub>2</sub>: C, 68.03; H, 6.30; N, 4.41. Found: C, 67.86; H, 6.31; N, 4.51.

**1-(*p*-tolyl) ethanone oximyl 4-isopropylcyclohexa-1, 3-dienecarboxylate (8d, C<sub>19</sub>H<sub>23</sub>NO<sub>2</sub>)**

IR (cm<sup>-1</sup>): 1734 (–O–C=O); 1592 (C=N). <sup>1</sup>H NMR (CDCl<sub>3</sub>, δ/ppm, 300 MHz): 7.64, 7.79 (d, 2H, *o*–C–H), 7.51, 7.54 (d, 2H, *m*–C–H); 7.12, 7.17 (d, 1H, OC–C=CH–), 5.87, 5.88 (d, 1H, –CH=C–(Me)<sub>2</sub>); 2.50-2.58 (m, H, –CH–(Me)<sub>2</sub>); 2.40-2.41 (t, 2H, –CH<sub>2</sub>–C–CO); 2.21-2.23 (t, 2H, –CH<sub>2</sub>–C–C=C); 2.27 (s, 3H, Ar–H); 1.80 (s, 3H, –N=C–CH<sub>3</sub>); 1.04-1.08 (d, 6H, CH<sub>3</sub>). TOF-ESI-MS (m/z): 297 [M+H]<sup>+</sup>. Anal. calcd for C<sub>19</sub>H<sub>23</sub>NO<sub>2</sub>: C, 76.77; H, 7.74; N, 4.71. Found: C, 75.86; H, 8.15; N, 5.21.

**Dicyclohexylmethanone oximyl 4-isopropylcyclohexa-1, 3-dienecarboxylate (8e, C<sub>23</sub>H<sub>35</sub>NO<sub>2</sub>)**

IR (cm<sup>-1</sup>): 1735 (–O–C=O); 1608 (C=N). <sup>1</sup>H NMR (CDCl<sub>3</sub>, δ/ppm, 300 MHz): 7.04, 7.05 (d, 1H, OC–C=CH–); 5.83, 5.85 (d, 1H, –CH=C–(Me)<sub>2</sub>); 2.51-2.57 (m, H, –CH–(Me)<sub>2</sub>); 2.35-2.40 (t, 2H, –CH<sub>2</sub>–C–CO); 2.20-2.26 (t, 2H, –CH<sub>2</sub>–C–C=C); 1.66-1.78 (m, 10H, cyclohexyl–C–H); 1.02-1.06 (d, 6H, CH<sub>3</sub>). TOF-ESI-MS (m/z): 261[M+H]<sup>+</sup>. Anal. calcd for C<sub>23</sub>H<sub>35</sub>NO<sub>2</sub>: C, 77.31; H, 9.80; N, 3.92. Found: C, 77.65; H, 9.63; N, 3.35.

**Picolinaldehyde oximyl 4-isopropylcyclohexa-1,3-dienecarboxylate (8f, C<sub>16</sub>H<sub>18</sub>N<sub>2</sub>O<sub>2</sub>)**

IR (cm<sup>-1</sup>): 1728 (–O–C=O); 1646 (C=N). <sup>1</sup>H NMR (CDCl<sub>3</sub>, δ/ppm, 300 MHz): 8.66-8.68 (d, 1H, pyridine-*α*–C–H); 7.75-7.80 (m, 1H, pyridine-*γ*–C–H); 7.35-7.37 (m, 2H, pyridine-*β*–C–H); 7.18, 7.20 (d, 1H, OC–C=CH–), 5.83, 5.85 (d, 1H, –CH=C–(Me)<sub>2</sub>); 2.89 (s, 1H, –N=C–H);

2.40-2.45 (m, H,  $-\text{CH}(\text{Me})_2$ ); 2.40-2.41 (t, 2H,  $-\text{CH}_2\text{-C-CO}$ ); 2.20-2.23 (t, 2H,  $-\text{CH}_2\text{-C-C=C}$ ); 1.04-1.08 (d, 6H,  $\text{CH}_3$ ). TOF-ESI-MS ( $m/z$ ): 270 $[\text{M}+\text{H}]^+$ . Anal. calcd for  $\text{C}_{16}\text{H}_{18}\text{N}_2\text{O}_2$ : C, 71.11; H, 6.67; N, 10.37. Found: C, 71.22; H, 6.87; N, 10.58.

**Propan-2-one oximyl 4-isopropylcyclohexa-1, 3-dienecarboxylate (8g,  $\text{C}_{13}\text{H}_{19}\text{NO}_2$ )**

IR ( $\text{cm}^{-1}$ ): 1735 ( $-\text{O-C=O}$ ); 1643 ( $\text{C=N}$ ).  $^1\text{H}$  NMR ( $\text{CDCl}_3$ ,  $\delta/\text{ppm}$ , 300 MHz): 7.04, 7.06 (d, 1H,  $\text{OC-C=CH-}$ ); 5.83, 5.85 (d, 1H,  $-\text{CH=C}(\text{Me})_2$ ); 2.42-2.54 (m, H,  $-\text{CH}(\text{Me})_2$ ); 2.39-2.41 (t, 2H,  $-\text{CH}_2\text{-C-CO}$ ); 2.20-2.26 (t, 2H,  $-\text{CH}_2\text{-C-C=C}$ ); 2.00 (s, 6H,  $-\text{N=C}(\text{Me})_2$ ); 1.02-1.06 (d, 6H,  $\text{CH}_3$ ). TOF-ESI-MS ( $m/z$ ): 221 $[\text{M}+\text{H}]^+$ . Anal. calcd for  $\text{C}_{13}\text{H}_{19}\text{NO}_2$ : C, 70.59; H, 8.60; N, 6.33. Found: C, 71.11; H, 8.68; N, 5.73.

**Butan-2-one oximyl 4-isopropylcyclohexa-1, 3-dienecarboxylate (8h,  $\text{C}_{14}\text{H}_{21}\text{NO}_2$ )**

IR ( $\text{cm}^{-1}$ ): 1729 ( $-\text{O-C=O}$ ); 1643 ( $\text{C=N}$ ).  $^1\text{H}$  NMR ( $\text{CDCl}_3$ ,  $\delta/\text{ppm}$ , 300 MHz): 7.04, 7.07 (d, 1H,  $\text{OC-C=CH-}$ ); 5.84, 5.86 (d, 1H,  $-\text{CH=C}(\text{Me})_2$ ); 2.57-2.60 (m, H,  $-\text{CH}(\text{Me})_2$ ); 2.39-2.41 (t, 2H,  $-\text{CH}_2\text{-C-CO}$ ); 2.15-2.17 (t, 2H,  $-\text{CH}_2\text{-C-C=C}$ ); 2.00 (s, 3H,  $-\text{N=C-CH}_3$ ); 1.37-1.41 (m, 2H,  $-\text{N=C-CH}_2-$ ); 1.03-1.05 (d, 6H,  $\text{CH}_3$ ); 0.90-1.00 (t, 3H,  $-\text{CH}_2\text{-CH}_3$ ). TOF-ESI-MS ( $m/z$ ): 236 $[\text{M}+\text{H}]^+$ ; 258 $[\text{M}+\text{Na}]^+$ . Anal. calcd for  $\text{C}_{14}\text{H}_{21}\text{NO}_2$ : C, 71.49; H, 8.94; N, 5.96. Found: C, 70.79; H, 9.00; N, 6.60.

***E*-benzaldehyde oximyl 4-isopropylcyclohexa-1,3-dienecarboxylate (8i,  $\text{C}_{17}\text{H}_{19}\text{NO}_2$ )**

IR ( $\text{cm}^{-1}$ ): 3395 ( $\text{H-C=N}$ ); 1725 ( $-\text{O-C=O}$ ); 1646 ( $\text{C=N}$ ).  $^1\text{H}$  NMR ( $\text{CDCl}_3$ ,  $\delta/\text{ppm}$ , 300 MHz): 8.43 (s, 1H,  $-\text{N=CH}$ ); 7.76, 7.78 (d, 2H, *o*- $\text{C-H}$ ); 7.33, 7.43 (m, 3H, *m*, *p*- $\text{C-H}$ ); 7.15, 7.16 (d, 1H,  $\text{OC-C=CH-}$ ); 5.84, 5.85 (d, 1H,  $-\text{CH=C}(\text{Me})_2$ ); 2.52-2.58 (m, H,  $-\text{CH}(\text{Me})_2$ ); 2.40-2.41 (t, 2H,  $-\text{CH}_2\text{-C-CO}$ ); 2.21-2.29 (t, 2H,  $-\text{CH}_2\text{-C-C=C}$ ); 1.04-1.10 (d, 6H,  $\text{CH}_3$ ). TOF-ESI-MS ( $m/z$ ):

269[M+H]<sup>+</sup>. Anal. calcd for C<sub>17</sub>H<sub>19</sub>NO<sub>2</sub>: C, 76.12; H, 7.06 ; N, 5.20. Found: C, 75.92; H, 7.16; N, 5.30.

**Acetophenone oximyl 4-isopropylcyclohexa-1, 3-dienecarboxylate (8j, C<sub>18</sub>H<sub>21</sub>NO<sub>2</sub>)**

IR (cm<sup>-1</sup>): 1727 (–O–C=O); 1641 (C=N). <sup>1</sup>H NMR (CDCl<sub>3</sub>, δ/ppm, 300 MHz): 7.77, 7.79 (d, 2H, *o*–C–H); 7.37-7.42 (m, 3H, *m*, *p*–C–H); 7.14, 7.17 (d, 1H, OC–C=CH–); 5.83, 5.85 (d, 1H, –CH=C–(Me)<sub>2</sub>); 2.52-2.57 (m, H, –CH–(Me)<sub>2</sub>); 2.40-2.42 (t, 2H, –CH<sub>2</sub>–C–CO); 2.21-2.23 (t, 2H, –CH<sub>2</sub>–C–C=C); 2.30 (s, 3H, –N=C–CH<sub>3</sub>); 1.04-1.10 (d, 6H, CH<sub>3</sub>). TOF-ESI-MS (m/z): 283[M+H]<sup>+</sup>. Anal. calcd for C<sub>18</sub>H<sub>21</sub>NO<sub>2</sub>: C, 76.33; H, 7.42; N, 4.95. Found: C, 76.35; H, 7.57; N, 4.78.



## The representative calculations/plots

**Table 2 Fungicidal activity of compounds against *R. solani***

| NO. | Compd.      | Fungicidal activity (%) at a concentration of ( $\mu\text{g/mL}$ ) |     |    |    |    | IC <sub>50</sub> | $y=ax+b$             | $R^2$ | log IC <sub>50</sub> |
|-----|-------------|--------------------------------------------------------------------|-----|----|----|----|------------------|----------------------|-------|----------------------|
|     |             | 256                                                                | 128 | 64 | 32 | 16 |                  |                      |       |                      |
| 1   | 3           | 100                                                                | 67  | 40 | 20 | 0  | 92.712           | $y = 0.236x - 2.722$ | 0.977 | 1.967                |
| 2   | 5a          | 100                                                                | 70  | 53 | 31 | 24 | 69.777           | $y = 0.175x - 1.445$ | 0.952 | 1.844                |
| 3   | 5b          | 100                                                                | 70  | 50 | 30 | 23 | 72.485           | $y = 0.177x - 1.528$ | 0.971 | 1.860                |
| 4   | 5c          | 100                                                                | 72  | 53 | 30 | 25 | 68.481           | $y = 0.177x - 1.456$ | 0.964 | 1.836                |
| 5   | 5d          | 100                                                                | 70  | 50 | 30 | 23 | 72.485           | $y = 0.177x - 1.528$ | 0.971 | 1.860                |
| 6   | 5e          | 100                                                                | 70  | 48 | 30 | 24 | 73.144           | $y = 0.177x - 1.525$ | 0.986 | 1.864                |
| 7   | 5f          | 100                                                                | 72  | 54 | 33 | 25 | 66.345           | $y = 0.174x - 1.382$ | 0.961 | 1.822                |
| 8   | 7a          | 100                                                                | 98  | 89 | 76 | 58 | 3.017            | $y = 0.235x - 0.102$ | 0.990 | 0.480                |
| 9   | 7b          | 100                                                                | 98  | 89 | 77 | 58 | 2.439            | $y = 0.236x - 0.083$ | 0.987 | 0.387                |
| 10  | 7c          | 100                                                                | 97  | 87 | 73 | 57 | 3.284            | $y = 0.221x - 0.099$ | 0.990 | 0.516                |
| 11  | 7d          | 100                                                                | 98  | 89 | 78 | 58 | 1.857            | $y = 0.237x - 0.063$ | 0.983 | 0.269                |
| 12  | 7e          | 100                                                                | 97  | 87 | 73 | 57 | 3.284            | $y = 0.221x - 0.099$ | 0.990 | 0.516                |
| 13  | 7f          | 100                                                                | 97  | 86 | 72 | 57 | 3.770            | $y = 0.218x - 0.112$ | 0.994 | 0.576                |
| 14  | 8a          | 100                                                                | 95  | 75 | 53 | 33 | 32.604           | $y = 0.206x - 1.089$ | 0.991 | 1.513                |
| 15  | 8b          | 100                                                                | 95  | 76 | 55 | 33 | 31.371           | $y = 0.207x - 1.051$ | 0.985 | 1.497                |
| 16  | 8c          | 100                                                                | 95  | 80 | 61 | 33 | 27.470           | $y = 0.211x - 0.948$ | 0.957 | 1.439                |
| 17  | 8d          | 100                                                                | 95  | 76 | 57 | 33 | 30.444           | $y = 0.206x - 1.011$ | 0.980 | 1.484                |
| 18  | 8e          | 100                                                                | 93  | 70 | 50 | 30 | 36.840           | $y = 0.200x - 1.155$ | 0.984 | 1.567                |
| 19  | 8f          | 100                                                                | 95  | 75 | 54 | 33 | 32.146           | $y = 0.206x - 1.069$ | 0.989 | 1.507                |
| 20  | 8g          | 100                                                                | 95  | 74 | 52 | 32 | 33.902           | $y = 0.207x - 1.138$ | 0.992 | 1.530                |
| 21  | 8h          | 100                                                                | 94  | 72 | 51 | 32 | 35.174           | $y = 0.201x - 1.114$ | 0.992 | 1.546                |
| 22  | 8i          | 100                                                                | 95  | 79 | 60 | 32 | 28.749           | $y = 0.211x - 0.995$ | 0.960 | 1.459                |
| 23  | 8j          | 100                                                                | 95  | 77 | 58 | 32 | 30.230           | $y = 0.208x - 1.026$ | 0.972 | 1.480                |
| 24  | Thiadimenol | 100                                                                | 98  | 89 | 76 | 59 | 1.945            | $y = 0.235x - 0.065$ | 0.992 | 0.289                |

### Arrival of equation 2

$$\log \text{IC}_{50} = - 8.3866 - 39.598 \times \text{HOMO} - 19.346 \times \text{DM} + 8.8104 \times q_{\text{max}}^{\text{O}} + 30.670 \times q_{\text{min}} \quad (2)$$

$$N = 22, R^2 = 0.9879, F = 348.41, S^2 = 0.0047$$

**Table 5 Fungicidal activity and structure descriptors of title compounds**

| No. | Compd. | log IC <sub>50</sub> | Structure descriptors |         |              |            |
|-----|--------|----------------------|-----------------------|---------|--------------|------------|
|     |        |                      | HOMO                  | DM      | $q_{\max}^O$ | $q_{\min}$ |
| 1   | 5a     | 1.844                | -0.3512               | -0.2067 | 0.3524       | -0.3512    |
| 2   | 5b     | 1.860                | -0.3534               | -0.2067 | 0.3523       | -0.3534    |
| 3   | 5c     | 1.836                | -0.3523               | -0.2067 | 0.3524       | -0.3523    |
| 4   | 5d     | 1.860                | -0.3525               | -0.2067 | 0.3520       | -0.3525    |
| 5   | 5e     | 1.864                | -0.3546               | -0.2066 | 0.3519       | -0.3546    |
| 6   | 5f     | 1.822                | -0.3534               | -0.2067 | 0.3521       | -0.3534    |
| 7   | 7a     | 0.480                | -0.2713               | -0.2072 | 0.2748       | -0.2713    |
| 8   | 7b     | 0.387                | -0.2710               | -0.2070 | 0.2522       | -0.2768    |
| 9   | 7c     | 0.516                | -0.2725               | -0.2072 | 0.2745       | -0.2725    |
| 10  | 7d     | 0.269                | -0.2718               | -0.2072 | 0.2748       | -0.2718    |
| 11  | 7e     | 0.516                | -0.2718               | -0.2072 | 0.2749       | -0.2718    |
| 12  | 7f     | 0.576                | -0.2731               | -0.2072 | 0.2746       | -0.2731    |
| 13  | 8a     | 1.513                | -0.2896               | -0.2095 | 0.3705       | -0.2896    |
| 14  | 8b     | 1.497                | -0.2917               | -0.4339 | 0.3685       | -0.4339    |
| 15  | 8c     | 1.439                | -0.2922               | -0.2071 | 0.3706       | -0.2922    |
| 16  | 8d     | 1.484                | -0.2950               | -0.2070 | 0.3696       | -0.2950    |
| 17  | 8e     | 1.567                | -0.2963               | -0.2070 | 0.3697       | -0.2963    |
| 18  | 8f     | 1.507                | -0.2873               | -0.2073 | 0.3706       | -0.2873    |
| 19  | 8g     | 1.530                | -0.2945               | -0.2086 | 0.3698       | -0.2945    |
| 20  | 8h     | 1.546                | -0.2970               | -0.2071 | 0.3691       | -0.2970    |
| 21  | 8i     | 1.459                | -0.2907               | -0.2072 | 0.3697       | -0.2907    |
| 22  | 8j     | 1.480                | -0.2940               | -0.2071 | 0.3697       | -0.2940    |

**Table 6 The best four-descriptor model**

| Descriptor No. | $X$                   | $\pm\Delta X$           | $t$ -Test | Descriptor                |
|----------------|-----------------------|-------------------------|-----------|---------------------------|
| 0              | -8.3866               | 1.5216                  | -5.5119   | Intercept                 |
| 1              | $-3.9598 \times 10^1$ | $1.1968 \times 10^1$    | -3.3086   | HOMO <sup>a</sup>         |
| 2              | $-1.9346 \times 10^1$ | 7.4859                  | -2.5843   | DM <sup>b</sup>           |
| 3              | 8.8104                | $4.5244 \times 10^{-1}$ | 19.4733   | $q_{\max}^O$ <sup>c</sup> |
| 4              | $3.0670 \times 10^1$  | $1.1916 \times 10^1$    | 2.5738    | $q_{\min}^d$              |

<sup>a</sup> Energy of the highest occupied molecular orbit in atomic units. <sup>b</sup> Dipole moment. <sup>c</sup> Max net atomic charge for a O atom. <sup>d</sup> Min net atomic charge.

**Table 8 Internal validation of the QSAR model**

| Training set | $N$ | $R^2$  | $F$    | $S^2$  | Test set | $N$ | $R^2$  | $F$    | $S^2$  |
|--------------|-----|--------|--------|--------|----------|-----|--------|--------|--------|
| A+B          | 15  | 0.9800 | 340.78 | 0.0043 | C        | 7   | 0.9843 | 345.90 | 0.0045 |
| B+C          | 14  | 0.9711 | 339.58 | 0.0041 | A        | 8   | 0.9814 | 343.25 | 0.0044 |
| A+C          | 15  | 0.9724 | 339.63 | 0.0050 | B        | 7   | 0.9793 | 341.47 | 0.0043 |
| Average      |     | 0.9745 | 340.00 | 0.0045 | Average  |     | 0.9817 | 343.54 | 0.0044 |

<sup>a</sup> Compounds A: 1, 4, 7, 10, 13, 16, 19, 22, Compounds B: 2, 5, 8, 11, 14, 17, 20, Compounds C: 3, 6, 9, 12, 15, 18, 21.
